# Supplementary material for: Carbonic anhydrase XII mediates the survival and prometastatic functions of macrophages in human hepatocellular carcinoma
Source: JCI journal article supplement (doi:10.1172/jci153110), 2022-03-31
Supplement: sd1 [file 1]

**Supplementary Materials for**  
**Carbonic anhydrase XII mediates the survival and pro-metastatic functions of**  
**macrophages in human hepatocellular carcinoma**

Wan-Ru Ning, Da Jiang, Xing-Chen Liu, Yu-Fan Huang, Zhi-Peng Peng, Ze-Zhou Jiang,  
Tiebang Kang, Shi-Mei Zhuang, Yan Wu<sup>\*</sup>, Limin Zheng<sup>\*</sup>

<sup>\*</sup>Corresponding authors. Email: zhenglm@mail.sysu.edu.cn (L.Z.); wuyan32@mail.sysu.edu.cn (Y.W.)

**This PDF file includes:**

Supplemental Figures 1 to 8

Supplemental Tables 1 to 7

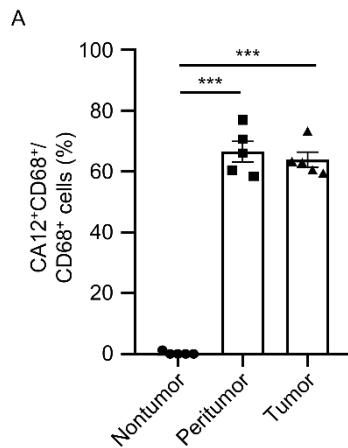

**Supplemental Figure 1. CA12 is upregulated on tumor-infiltrating monocytes/macrophages.**

Frozen sections of HCC samples were stained with anti-human CD68 antibody, anti-human CA12 antibody, and DAPI. The colocalization and distribution of cell signals were analyzed by confocal microscopy. Ratios of CA12<sup>+</sup>CD68<sup>+</sup> cells in total CD68<sup>+</sup> cells in different tissue regions were analyzed.  $n = 5$ , one-way analysis of variance (ANOVA) was used for statistical analysis.  $***P < 0.001$ .

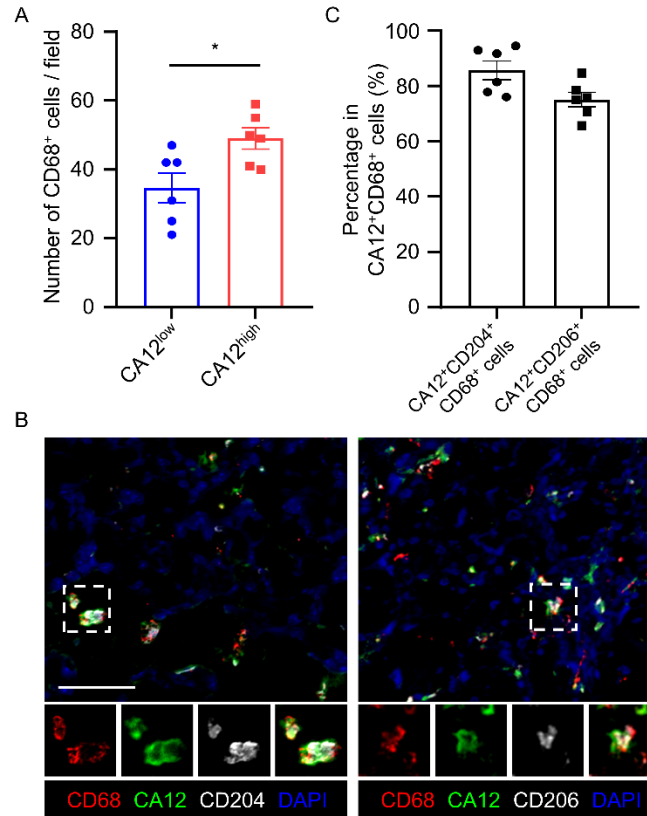

**Supplemental Figure 2. Correlation with CD68 and co-localization with CD204 and CD206 signals of CA12 on HCC tumor infiltrating monocytes/macrophages. (A)** Lymphocytes were purified from tumor tissues of 12 HCC patients. Their levels of *CA12* expression were measured by qPCR. Frozen sections from the same patients were stained with anti-human CD68 antibody, and densities of CD68<sup>+</sup> cells infiltration were calculated under confocal microscopy. Patients were then divided into 2 groups according to their median value of CA12 expression in tumor tissues. Levels of CD68<sup>+</sup> cells infiltration between the CA12<sup>high</sup> and CA12<sup>low</sup> group was compared. Two-tailed Student's *t*-test was used for statistical analysis. The results were expressed as the mean ± SEM. \**P* < 0.05. **(B and C)** Frozen sections of HCC samples were stained with anti-human CD68 antibody, anti-human CA12 antibody, anti-human CD204 antibody, and DAPI; or anti-human CD68 antibody, anti-human CA12 antibody, anti-human CD206 antibody, and DAPI. The

colocalization and distribution of different cell signals were visualized **(B)**. Ratios of CA12<sup>+</sup>CD204<sup>+</sup>CD68<sup>+</sup> or CA12<sup>+</sup>CD206<sup>+</sup>CD68<sup>+</sup> cells in total CA12<sup>+</sup>CD68<sup>+</sup> cells in tumor tissues were analyzed **(C)**. Red: CD68, green: CA12, white: CD204/CD206, blue: DAPI. Scale bar: 50  $\mu$ m. One out of 5 representative micrographs from 6 independent experiments was shown. HCC, hepatocellular carcinoma; CA12, carbonic anhydrase XII; qPCR, quantitative real-time PCR.

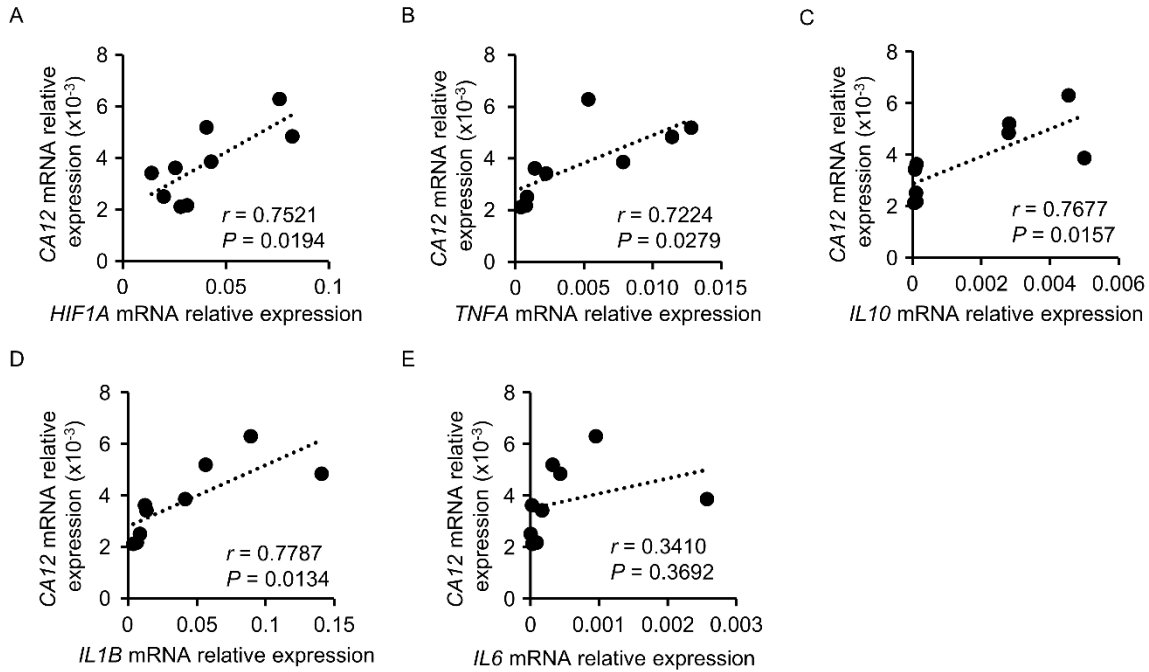

**Supplemental Figure 3. The level of CA12 expression is positively correlated with those of HIF1 $\alpha$  and autocrine cytokines in HCC tumor-infiltrating monocytes/macrophages. (A-E)** Fresh CD14<sup>+</sup> cells were purified from tumor tissues from 9 patients with HCC. The expression of *CA12*, *HIF1A* and cytokines was determined by qPCR, and the correlations between the levels of CA12 and HIF1 $\alpha$  or cytokines in the cells were analyzed. Pearson correlation and linear regression analysis was used for statistical analysis. HCC, hepatocellular carcinoma; CA12, carbonic anhydrase XII; HIF1A, hypoxia-inducible factor 1 alpha; IL, interleukin; qPCR, quantitative real-time PCR.

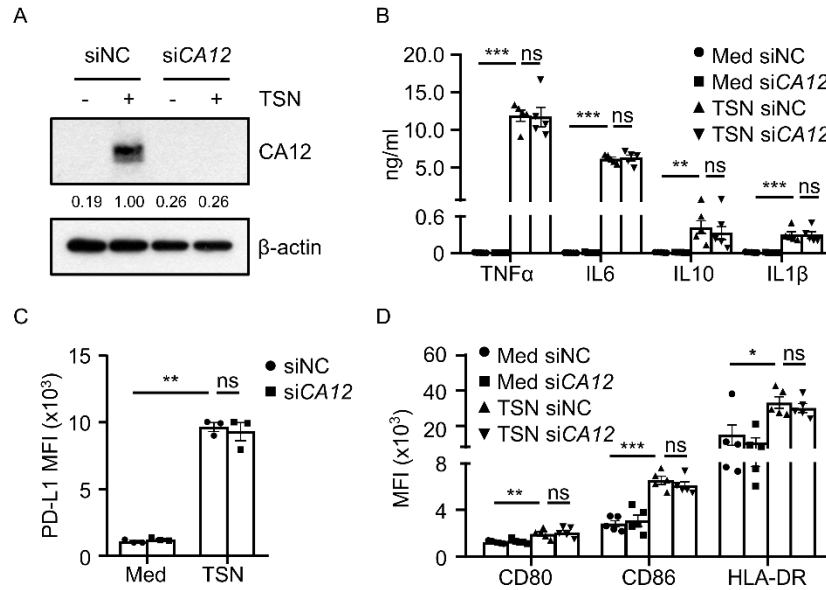

**Supplemental Figure 4. siCA12 did not influence the TSN-induced production of cytokines and expression of some surface markers.** CD14<sup>+</sup> cells were purified from the peripheral blood of healthy donors. Cells were transfected with siNC or siCA12 and then treated with or without HepG2 TSN for 48 hours. **(A)** The expression levels of CA12 were determined by western blotting ( $n = 5$ ). **(B)** The levels of TNF $\alpha$ , IL6, IL10 and IL1 $\beta$  production were measured by ELISA ( $n = 5$ ). **(C)** The expression levels of PD-L1 were analyzed by flow cytometry ( $n = 3$ ). **(D)** The expression levels of CD80, CD86, and HLA-DR were analyzed by flow cytometry ( $n = 5$ ). Results shown in **B**, **C** and **D** are expressed as the mean  $\pm$  SEM.  $P$  values were obtained by two-way ANOVA. \* $P < 0.05$ , \*\* $P < 0.01$ , \*\*\* $P < 0.001$ . CA12, carbonic anhydrase XII; TSN, tumor culture supernatants; TNF, tumor necrosis factor; IL, interleukin; ELISA, enzyme-linked immunosorbent assay; PD-L1, programmed death-ligand 1; ANOVA, analysis of variance; ns, no significance.

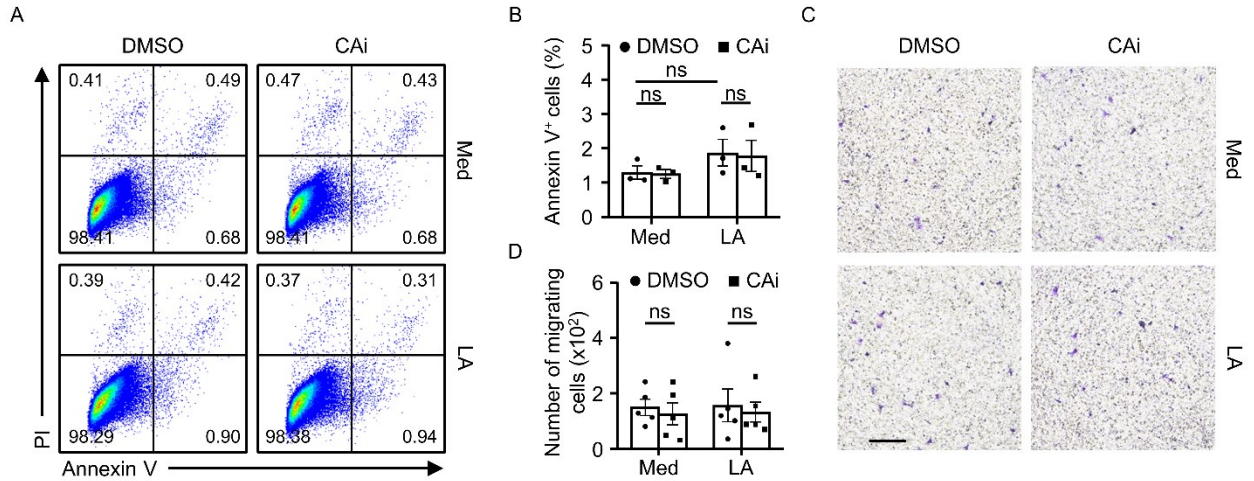

**Supplemental Figure 5. CA12 inhibitor does not directly affect the survival and migration of cancer cells.** Hepa1-6 cells were treated with medium (Med) or L-lactic acid (LA, 20 mM) in the presence or absence of DMSO or CAi for 24 hours. (**A** and **B**) Apoptosis of these cells was analyzed by flow cytometry ( $n = 3$ ). (**C** and **D**) Migration of these cells was visualized and calculated ( $n = 5$ ). Scale bar: 200  $\mu\text{m}$ . Results shown in **B** and **D** are expressed as the mean  $\pm$  SEM.  $P$  values were obtained by two-way ANOVA (**B** and **D**). CA12, carbonic anhydrase XII; DMSO, dimethyl sulfoxide; CAi, CA12 inhibitor; ANOVA, analysis of variance; ns, no significance.

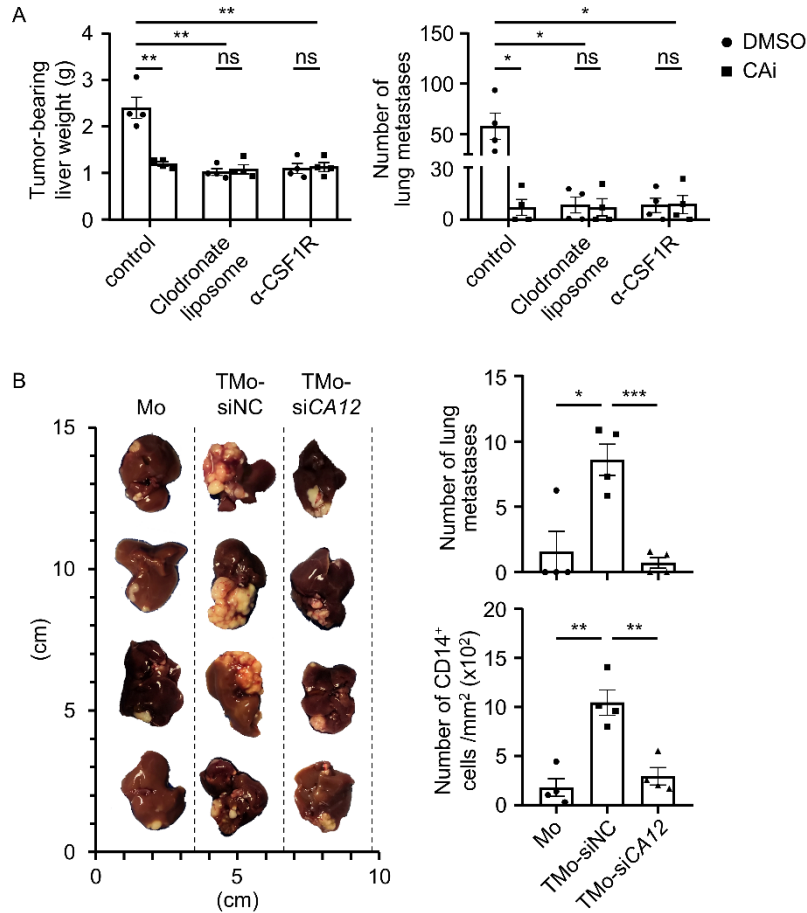

**Supplemental Figure 6. Effects of the CA12 inhibitor on tumor-bearing mice are dependent on the availability of monocytes/macrophages.** (A) Wildtype mice bearing orthotopic Hepa1-6 tumors were i.p. injected with control agents (control liposome (52.5 mg/kg injected 24 hours before the orthotopic transplantation of Hepa1-6, and 35 mg/kg twice a week thereafter) + control IgG (10mg/kg, every 3 days beginning on day 2)), or clodronate liposome (52.5 mg/kg injected 24 hours before the orthotopic transplantation of Hepa1-6, and 35 mg/kg liposome twice a week thereafter), or  $\alpha$ -CSF1R (10mg/kg, every 3 days beginning on day 2), AND DMSO or CAi every day beginning on day 6. On day 24, livers and lungs were excised from mice in different treatment groups, and tumor-bearing-liver weights and tumor lung metastases were measured or counted respectively. (B) Monocytes purified from the peripheral blood of healthy donors were left



untreated (Mo), transfected with siNC and then treated with HepG2 TSN for 48 hours (TMo-siNC), or transfected with siCA12 before being exposed to TSN for 48 hours (TMo-siCA12). These cells were then i.p. injected into NOD-SCID mice bearing orthotopic HepG2 tumors twice a week. On day 24, tumors and lungs were excised from mice in different treatment groups. Tumor volumes and tumor lung metastases were measured. Paraffin-embedded sections of tumor tissues were stained with anti-human CD14 antibody, and the infiltration of CD14<sup>+</sup> cells was analyzed. There were 4 representatives for each group in **A** and **B**. Results are expressed as the mean  $\pm$  SEM. *P* values were obtained by two-tailed Student's *t*-test (**A**), or two-way ANOVA (**B**). \**P* < 0.05, \*\**P* < 0.01, \*\*\**P* < 0.001. CA12, carbonic anhydrase XII; DMSO, dimethyl sulfoxide; CAi, CA12 inhibitor; CSF1R, colony-stimulating factor 1 receptor; ANOVA, analysis of variance; ns, no significance.

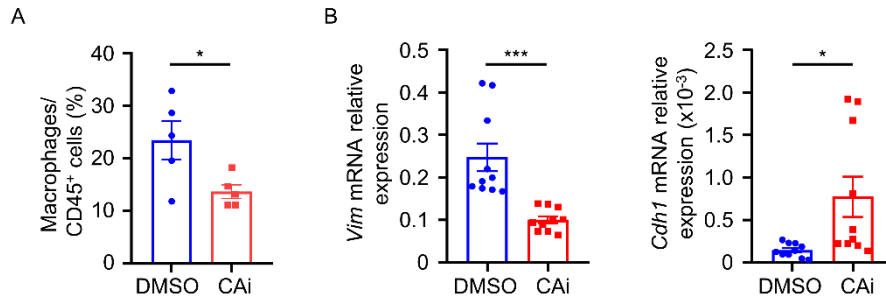

**Supplemental Figure 7. CA12 inhibitor reduces levels of F4/80<sup>+</sup> macrophages infiltration and impacts EMT-related markers expression in tumor bearing mice.** An orthotopic hepatic tumor model was established by subcapsular intrahepatic injection of Hepa1-6 cells on day 0. DMSO or CAi was then intraperitoneally administered every day beginning on day 6. **(A)** Tumors were excised at day 24 and leukocytes were isolated from differently-treated tumors. Levels of F4/80<sup>+</sup> macrophages infiltration in tumor tissues were determined by flow cytometry ( $n = 5$  for each group). **(B)** Tumors were excised at day 24 and levels of Vimentin (*Vim*) and E-cadherin (*Cdh1*) expression in tumor tissues were measured by qPCR ( $n = 10$  for each group). Results are expressed as the mean  $\pm$  SEM. Two-tailed Student's *t*-test was used for statistical analysis. \* $P < 0.05$ , \*\*\* $P < 0.001$ . CA12, carbonic anhydrase XII; DMSO, dimethyl sulfoxide; CAi, CA12 inhibitor; qPCR, quantitative real-time PCR.

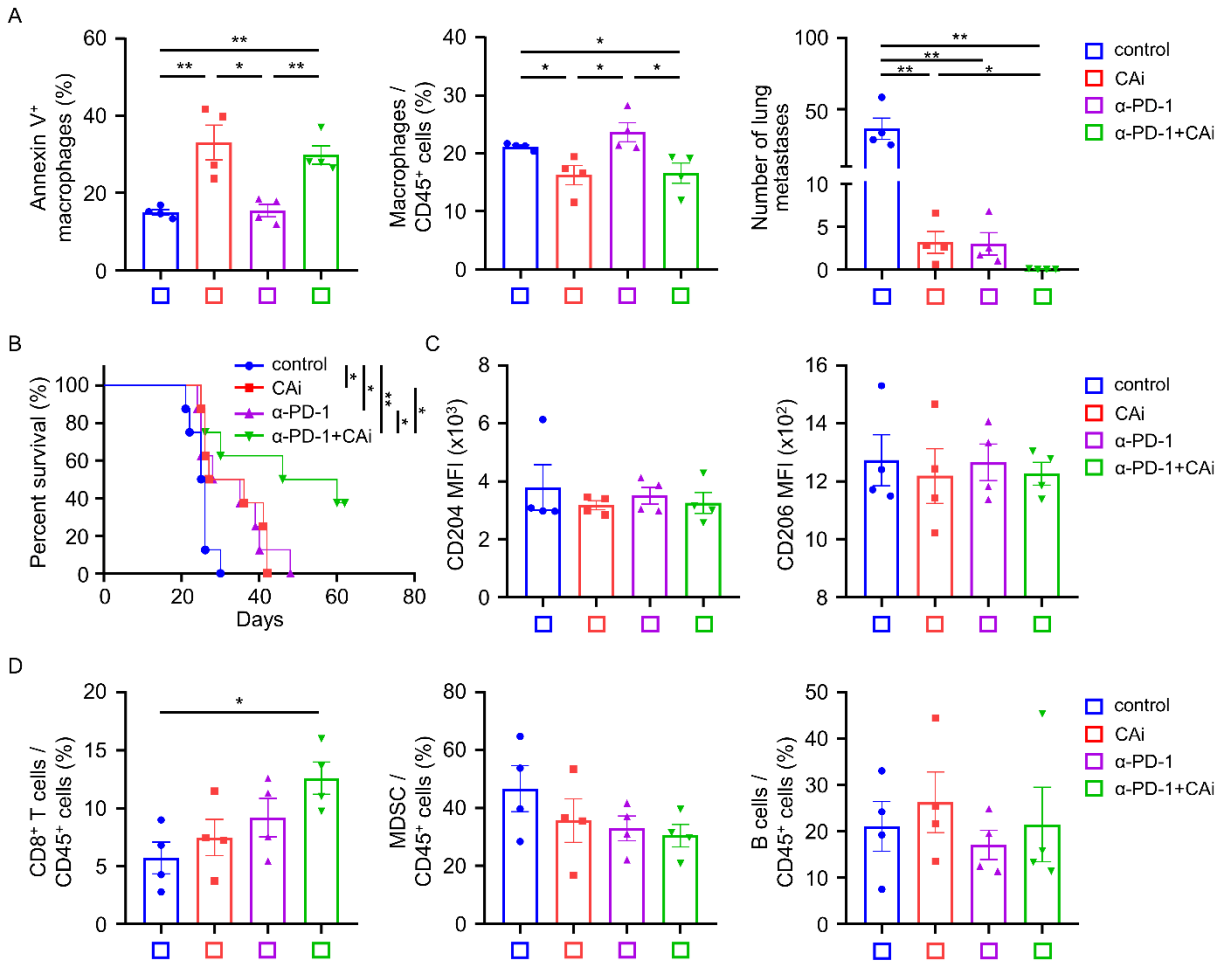

**Supplemental Figure 8. Effects of combinational treatment with CA12 inhibitor and anti-PD-1 antibody on tumor-bearing mice.** (A-C) C57BL/6J mice with orthotopic Hepa1-6 tumors were treated with DMSO together with control IgG (designated as control), CA12 inhibitor (CAi), anti-mouse PD-1 antibody, or CAi in combination with anti-mouse PD-1 antibody. Lung metastases and mice survival were analyzed, and the expression of different markers in tumor tissues were determined by flow cytometry. There were 4 representatives for each group in **A**, **C** and **D**, and there were 8 representatives for each group in **B**. Results are expressed as the mean  $\pm$  SEM. *P* values were obtained by two-tailed Student's *t*-test (**A**, **C** and **D**), or the log-rank test (**B**). \**P* < 0.05, \*\**P* < 0.01.  $\alpha$ -, anti-; DMSO, dimethyl sulfoxide; CAi, CA12 inhibitor; PD-1, programmed cell death protein 1; MDSC, myeloid-derived suppressor cell.

**Supplemental Table 1. Univariate and multivariate analysis of factors associated with overall survival and tumor recurrence of patients with HCC.**

| Variables                                                            | OS                |              |              |                | TR             |              |             |                |
|----------------------------------------------------------------------|-------------------|--------------|--------------|----------------|----------------|--------------|-------------|----------------|
|                                                                      | Univariate        | Multivariate |              |                | Univariate     | Multivariate |             |                |
|                                                                      | <i>P</i> value    | HR           | 95% CI       | <i>P</i> value | <i>P</i> value | HR           | 95% CI      | <i>P</i> value |
| Age, years (>50 vs ≤50)                                              | 0.315             |              |              | n.a.           | 0.715          |              |             | n.a.           |
| Gender (male vs female)                                              | 0.255             |              |              | n.a.           | 0.294          |              |             | n.a.           |
| HBsAg (positive vs negative)                                         | 0.862             |              |              | n.a.           | 0.075          |              |             | n.a.           |
| Cirrhosis (present vs absent)                                        | 0.057             |              |              | n.a.           | 0.524          |              |             | n.a.           |
| ALT, U/L (>40 vs ≤40)                                                | 0.340             |              |              | n.a.           | 0.800          |              |             | n.a.           |
| AFP, ng/ml (>25 vs ≤25)                                              | 0.157             |              |              | n.a.           | 0.542          |              |             | n.a.           |
| Tumor size, cm (>5 vs ≤5)                                            | 0.090             |              |              | n.a.           | 0.145          |              |             | n.a.           |
| Tumor multiplicity (multiple vs solitary)                            | <b>&lt; 0.001</b> | 4.918        | 0.871-27.788 | 0.071          | <b>0.011</b>   | 1.463        | 0.488-4.381 | 0.497          |
| Vascular invasion (present vs absent)                                | 0.089             |              |              | n.a.           | 0.216          |              |             | n.a.           |
| Metastatic potential <sup>A</sup> (yes vs no)                        | 0.109             |              |              | n.a.           | 0.290          |              |             | n.a.           |
| TNM stage (II + III vs I)                                            | <b>0.002</b>      | 0.727        | 0.124-4.256  | 0.724          | <b>0.007</b>   | 1.346        | 0.452-4.009 | 0.593          |
| Tumor differentiation (III + IV vs I + II)                           | 0.167             |              |              | n.a.           | 0.678          |              |             | n.a.           |
| Intratumoral CD68 <sup>+</sup> CA12 <sup>+</sup> cells (high vs low) | <b>0.008</b>      | 2.734        | 1.099-6.799  | <b>0.030</b>   | <b>0.005</b>   | 2.003        | 1.087-3.690 | <b>0.026</b>   |

Cox proportional hazards regression model. Variables used in multivariate analysis were adopted by univariate analysis. The bold terms represent statistical significance (< 0.05).

<sup>A</sup>Patients who developed intrahepatic metastases, or extrahepatic metastases were considered as cases with metastatic potential.

**Abbreviations:** HCC, hepatocellular carcinoma; HBsAg, hepatitis B surface antigen; ALT, alanine aminotransferase; AFP, α-fetoprotein; TNM, tumor-node-metastasis; OS, overall survival; TR, tumor recurrence; HR, hazard ratio; CI, confidence interval; n.a., not adopted.

**Supplemental Table 2. Association of the density of intratumoral CD68<sup>+</sup>CA12<sup>+</sup> cells with clinicopathological characteristics of 72 patients with HCC.**

| Variables                         | Intratumoral CD68 <sup>+</sup> CA12 <sup>+</sup> cells |      |                |              |
|-----------------------------------|--------------------------------------------------------|------|----------------|--------------|
|                                   | Low                                                    | High | <i>P</i> value |              |
| Age, years                        | ≤50                                                    | 16   | 21             | 0.349        |
|                                   | >50                                                    | 19   | 16             |              |
| Gender                            | Male                                                   | 29   | 31             | 0.916        |
|                                   | Female                                                 | 6    | 6              |              |
| HBsAg                             | Negative                                               | 1    | 1              | 0.968        |
|                                   | Positive                                               | 34   | 36             |              |
| Cirrhosis                         | Absent                                                 | 14   | 12             | 0.504        |
|                                   | Present                                                | 21   | 25             |              |
| ALT, U/L                          | ≤40                                                    | 19   | 17             | 0.479        |
|                                   | >40                                                    | 16   | 20             |              |
| AFP, ng/ml                        | ≤25                                                    | 12   | 10             | 0.504        |
|                                   | >25                                                    | 23   | 27             |              |
| Tumor size, cm                    | ≤5                                                     | 21   | 14             | 0.060        |
|                                   | >5                                                     | 14   | 23             |              |
| Tumor multiplicity                | Solitary                                               | 30   | 25             | 0.070        |
|                                   | Multiple                                               | 5    | 12             |              |
| Metastatic potential <sup>A</sup> | No                                                     | 31   | 25             | <b>0.032</b> |
|                                   | Yes                                                    | 4    | 12             |              |
| TNM stage                         | I                                                      | 29   | 23             | <b>0.050</b> |
|                                   | II + III                                               | 6    | 14             |              |
| Tumor differentiation             | I + II                                                 | 20   | 21             | 0.974        |
|                                   | III + IV                                               | 15   | 16             |              |

*P* value was analyzed by Chi-square test. The bold terms represent statistical significance (< 0.05).

<sup>A</sup>Patients who developed intrahepatic metastases, or extrahepatic metastases were considered as cases with metastatic potential.

**Abbreviations:** HCC, Hepatocellular carcinoma; HBsAg, hepatitis B surface antigen; ALT, alanine aminotransferase; AFP,  $\alpha$ -fetoprotein; TNM, tumor-node-metastasis.

**Supplemental Table 3. Association of the mRNA expression of CCL8 in tumor-associated macrophages with clinicopathological characteristics of 39 patients with HCC.**

| Variables                         | Expression of CCL8 in TAMs |      |                |              |
|-----------------------------------|----------------------------|------|----------------|--------------|
|                                   | Low                        | High | <i>P</i> value |              |
| Age, years                        | ≤52                        | 9    | 11             | 0.634        |
|                                   | >52                        | 10   | 9              |              |
| Gender                            | Male                       | 17   | 15             | 0.239        |
|                                   | Female                     | 2    | 5              |              |
| HBsAg                             | Negative                   | 6    | 4              | 0.408        |
|                                   | Positive                   | 13   | 16             |              |
| Cirrhosis                         | Absent                     | 6    | 4              | 0.408        |
|                                   | Present                    | 13   | 16             |              |
| ALT, U/L                          | ≤40                        | 13   | 8              | 0.075        |
|                                   | >40                        | 6    | 12             |              |
| AFP, ng/ml                        | ≤25                        | 11   | 6              | 0.079        |
|                                   | >25                        | 8    | 14             |              |
| Tumor size, cm                    | ≤5                         | 6    | 2              | 0.095        |
|                                   | >5                         | 13   | 18             |              |
| Tumor multiplicity                | Solitary                   | 13   | 16             | 0.408        |
|                                   | Multiple                   | 6    | 4              |              |
| Metastatic potential <sup>A</sup> | No                         | 15   | 6              | <b>0.002</b> |
|                                   | Yes                        | 4    | 14             |              |
| TNM stage                         | I                          | 6    | 8              | 0.584        |
|                                   | II + III                   | 13   | 12             |              |
| Tumor differentiation             | I + II                     | 9    | 12             | 0.429        |
|                                   | III + IV                   | 10   | 8              |              |

*P* value was analyzed by Chi-square test. The bold terms represent statistical significance (< 0.05).

<sup>A</sup>Patients who developed intrahepatic metastases, or extrahepatic metastases were considered as cases with metastatic potential.

**Abbreviations:** HCC, Hepatocellular carcinoma; HBsAg, hepatitis B surface antigen; ALT, alanine aminotransferase; AFP,  $\alpha$ -fetoprotein; TNM, tumor-node-metastasis; TAM, tumor-associated macrophage.

**Supplemental Table 4. Clinical characteristics of HCC patients.**

| Patients characteristics                   | Cohort 1  | Cohort 2     |
|--------------------------------------------|-----------|--------------|
| No. of patients                            | 72        | 49           |
| Age, years (median, range)                 | 50, 23-78 | 48, 31-71    |
| Gender (male/female)                       | 60/12     | 42/7         |
| HBsAg (negative/positive)                  | 2/70      | 10/39        |
| Cirrhosis (absent/present)                 | 26/46     | 10/39        |
| ALT, U/L (median, range)                   | 40, 8-348 | 39, 9-1401.3 |
| AFP, ng/ml ( $\leq 25$ / $>25$ )           | 22/50     | 17/32        |
| Tumor size, cm ( $\leq 5$ / $>5$ )         | 35/37     | 14/35        |
| Tumor multiplicity (solitary/multiple)     | 55/17     | 35/14        |
| Vascular invasion (absent/present)         | 65/7      | 20/29        |
| Metastatic potential <sup>A</sup> (no/yes) | 56/16     | 29/20        |
| TNM stage (I/II+III)                       | 52/20     | 14/35        |
| Tumor differentiation (I+II/III+IV)        | 41/31     | 24/25        |

<sup>A</sup>Patients who developed intrahepatic metastases, or extrahepatic metastases were considered as cases with metastatic potential.

**Abbreviations:** HCC, Hepatocellular carcinoma; HBsAg, hepatitis B surface antigen; ALT, alanine aminotransferase; AFP,  $\alpha$ -fetoprotein; TNM, tumor-node-metastasis.

**Note:** Samples from patients in Cohort 1 were used in Figure 1F, Supplemental Table 1 and Supplemental Table 2; Samples from patients in Cohort 2 were used in Figure 1, A-E, Figure 2A and B, Figure 5, A-C, Figure 5, I-J, Figure 6, H-I, Supplemental Figure 1, Supplemental Figure 2, A-C, Supplemental Figure 3, A-E and Supplemental Table 3.

**Supplemental Table 5. Sequences of primers and siRNAs.**

| Genes                    |         | Sequences                |
|--------------------------|---------|--------------------------|
| Human <i>CA12</i> (qPCR) | Forward | TTGGCATCTGTATTGTGGTGGTGG |
|                          | Reverse | CAGCTTTGAATTCCTGCTGCTTGG |
| Human <i>CA1</i> (qPCR)  | Forward | TTGAGGACAACGATAACCGATCA  |
|                          | Reverse | CTACGTGAAGCTCGGCAGAAT    |
| Human <i>CA2</i> (qPCR)  | Forward | ATCGACACTCATAACAGCCAAGT  |
|                          | Reverse | AAAGCATGACCATTGTTGAGGA   |
| Human <i>CA3</i> (qPCR)  | Forward | AAACCAGTCGCCCGTTGAG      |
|                          | Reverse | CCACCATCATAAGACACAGACCA  |
| Human <i>CA4</i> (qPCR)  | Forward | TGGTCCGACTTGCCATATAAGG   |
|                          | Reverse | CTCTTTCACATTCCTCGATGTCC  |
| Human <i>CA5A</i> (qPCR) | Forward | GTGCATGGCAAACCAGCAATA    |
|                          | Reverse | CCGCTTCATAGGAGACCCTG     |
| Human <i>CA5B</i> (qPCR) | Forward | TATGATCCCGGCTTAAAACCAC   |
|                          | Reverse | GGTAGTTGTGTTCCAGGGGTC    |
| Human <i>CA6</i> (qPCR)  | Forward | TTTGTGCTGGCAGATTTTGTC    |
|                          | Reverse | CTGCGGTAATCGTTGTGGATG    |
| Human <i>CA7</i> (qPCR)  | Forward | TGACAGCGATGACCGAACC      |
|                          | Reverse | ACTTCTTGGCATTCCAGTGAAC   |
| Human <i>CA8</i> (qPCR)  | Forward | GGAAGTCCAAAACAATACCTTGC  |
|                          | Reverse | TGGTGAGAGAGCCTTCATACAC   |
| Human <i>CA9</i> (qPCR)  | Forward | TTTGCCAGAGTTGACGAGGC     |
|                          | Reverse | GCTCATAGGCACTGTTTTCTTCC  |
| Human <i>CA10</i> (qPCR) | Forward | CTTTCTGGGGATTGGTGAAGTC   |
|                          | Reverse | TGTGACTGGTCTCTATGTTGACT  |
| Human <i>CA11</i> (qPCR) | Forward | AAGCTCCGGGGAACCTTGTA     |



---

|                           |         |                         |
|---------------------------|---------|-------------------------|
|                           | Reverse | ACTGAGTCGGTGGCTGTAAAG   |
| Human <i>CAI3</i> (qPCR)  | Forward | CGAGCACAACGGTCCTATTCA   |
|                           | Reverse | CTAAGTGGTCGGAGGGAAGAG   |
| Human <i>CAI4</i> (qPCR)  | Forward | ACAATGGCTCGCTCACAACTC   |
|                           | Reverse | GGGCTCGGTAGTTCTGTACCA   |
| Human <i>VEGFA</i> (qPCR) | Forward | CATCTTCAAGCCATCCTGTG    |
|                           | Reverse | TGCATTCACATTTGTTGTGC    |
| Human <i>VEGFB</i> (qPCR) | Forward | GAGATGTCCCTGGAAGAACACA  |
|                           | Reverse | GAGTGGGATGGGTGATGTCAG   |
| Human <i>PDGFB</i> (qPCR) | Forward | CTCGATCCGCTCCTTTGATGA   |
|                           | Reverse | CGTTGGTGCGGTCTATGAG     |
| Human <i>PDGFA</i> (qPCR) | Forward | GCAAGACCAGGACGGTCATTT   |
|                           | Reverse | GGCACTTGACACTGCTCGT     |
| Human <i>OSM</i> (qPCR)   | Forward | GTGAACGGAACAGGTCTC      |
|                           | Reverse | GAAGGCAGTGACACCATC      |
| Human <i>MMP9</i> (qPCR)  | Forward | AGACCTGGGCAGATTCCAAAC   |
|                           | Reverse | CGGCAAGTCTTCCGAGTAGT    |
| Human <i>GLUT1</i> (qPCR) | Forward | CTTTGTGGCCTTCTTTGAAGTG  |
|                           | Reverse | GACCACACAGTTGCTCCACATAC |
| Human <i>HIF1A</i> (qPCR) | Forward | CCATTAGAAAGCAGTTCCGC    |
|                           | Reverse | TGGGTAGGAGATGGAGATGC    |
| Human <i>TNFA</i> (qPCR)  | Forward | AAGCCTGTAGCCCATGTTG     |
|                           | Reverse | TGGTAGGAGACGGCGATG      |
| Human <i>IL6</i> (qPCR)   | Forward | TCAGCCCTGAGAAAGGAGACA   |
|                           | Reverse | GATTTTCACCAGGCAAGTCTCC  |
| Human <i>IL10</i> (qPCR)  | Forward | CAACCTGCCTAACATGCTTC    |
|                           | Reverse | CCTTGATGTCTGGGTCTTGG    |

---

---

|                              |           |                          |
|------------------------------|-----------|--------------------------|
| Human <i>IL1B</i> (qPCR)     | Forward   | CGAATCTCCGACCACCACTAC    |
|                              | Reverse   | GATGAAGGGAAAGAAGGTGCTC   |
| Human <i>CCL8</i> (qPCR)     | Forward   | CATTGTTCTCCCTCCTACCTGTC  |
|                              | Reverse   | AGCACTGATTGCCAAAGAATACC  |
| Human <i>CDHI</i> (qPCR)     | Forward   | CCGCTGGCGTCTGTA GGAAGG   |
|                              | Reverse   | GGCTCTTTGACCACCGCTCTCC   |
| Human <i>VIM</i> (qPCR)      | Forward   | GAGAACTTTGCCGTTGAAGC     |
|                              | Reverse   | TCCAGCAGCTTCCTGTAGGT     |
| Human <i>ACTB</i> (qPCR)     | Forward   | GGATGCAGAAGGAGATCACT     |
|                              | Reverse   | CGATCCACACGGAGTACTTG     |
| Mouse <i>Ccl8</i> (qPCR)     | Forward   | TCTACGCAGTGCTTCTTTGCC    |
|                              | Reverse   | AAGGGGGATCTTCAGCTTTAGTA  |
| Mouse <i>Vim</i> (qPCR)      | Forward   | CGTCCACACGCACCTACAG      |
|                              | Reverse   | GGGGGATGAGGAATAGAGGCT    |
| Mouse <i>Cdh1</i> (qPCR)     | Forward   | GAAGACGCTGAGCATGTGAA     |
|                              | Reverse   | CAGGACCAGGAGAAGAGTGC     |
| Mouse <i>Actb</i> (qPCR)     | Forward   | CCAGGTCATCACTATTGGCAAC   |
|                              | Reverse   | TACGGATGTCAACGTCACAC     |
| Human <i>CA12</i> #1 (siRNA) | Sense     | GCAAGUCUGUACUGCGGCAdTdT  |
|                              | Antisense | UGCCGCAGUACAGACUUGCdAdC  |
| Human <i>CA12</i> #2 (siRNA) | Sense     | GGACAACCCUCAUGACGAAdTdT  |
|                              | Antisense | UUCGUCAUGAGGGUUGUCCdUdU  |
| Human <i>HIF1A</i> (siRNA)   | Sense     | CUGAUGACCAGCAACUUGAdTdT  |
|                              | Antisense | UCAAGUUGCUGGUCAUCAGdTdT  |
| Negative control (siRNA)     | Sense     | UUCUCCGAACGUGUCACGUdTdT  |
|                              | Antisense | ACGUGACACGUUCGGAGAAAdTdT |

---

**Supplemental Table 6. Antibodies used in studies.**

| <b>Name</b>                                          | <b>Supplier</b>          | <b>Cat no.</b> | <b>Clone no.</b>  |
|------------------------------------------------------|--------------------------|----------------|-------------------|
| PE/Cyanine7-conjugated anti-mouse CD11b              | BioLegend                | 101215         | M1/70             |
| BV421-conjugated anti-mouse Ly6C                     | BioLegend                | 128031         | HK1.4             |
| BV570-conjugated anti-mouse CD45                     | BioLegend                | 103136         | 30-F11            |
| APC-conjugated anti-mouse F4/80                      | BioLegend                | 123116         | BM8               |
| PE-conjugated anti-mouse CD204                       | BioLegend                | 154709         | 1F8C33            |
| APC-conjugated anti-mouse CD206                      | BioLegend                | 141707         | C068C2            |
| BV421-conjugated anti-mouse B220                     | BioLegend                | 103251         | RA3-6B2           |
| AF700-conjugated anti-mouse CD11b                    | BioLegend                | 101222         | M1/70             |
| PE-conjugated anti-mouse CD3                         | BioLegend                | 100206         | 17A2              |
| APC-conjugated anti-mouse Gr1                        | BioLegend                | 108411         | RB6-8C5           |
| PE/Cyanine7-conjugated anti-mouse F4/80              | BioLegend                | 123113         | BM8               |
| Alexa Fluor 488 donkey anti-rabbit IgG               | Thermo Fisher Scientific | A-21206        | polyclonal        |
| FITC-conjugated anti-mouse Gr-1                      | eBioscience              | 11-5931-85     | RB6-8C5           |
| eFluor 450-conjugated anti-mouse CD8                 | eBioscience              | 48-0081-82     | 53-6.7            |
| PE-conjugated anti-human CD80                        | eBioscience              | 12-0809-42     | 2D10.4            |
| FITC-conjugated anti-mouse Gr1                       | eBioscience              | 11-5931-85     | RB6-8C5           |
| PE-CF594-conjugated anti-mouse Ly6G                  | BD Biosciences           | 562700         | 1A8               |
| AF700-conjugated anti-human CD14                     | BD Biosciences           | 557923         | M5E2              |
| PE-conjugated anti-human PD-L1                       | BD Biosciences           | 557924         | MIH1              |
| APC-conjugated anti-human CD86                       | BD Biosciences           | 555660         | 2331(FUN-1)       |
| BV421-conjugated anti-human HLA-DR                   | BD Biosciences           | 562804         | G46-6             |
| Mouse anti-human HIF-1 $\alpha$                      | BD Biosciences           | 610958         | 54/HIF-1 $\alpha$ |
| Mouse anti-human CD206                               | R&D System               | MAB25341       | 685645            |
| Human TNF $\alpha$ neutralizing antibody             | R&D Systems              | MAB610         | 28401             |
| Human IL6 neutralizing antibody                      | R&D Systems              | MAB2061        | 1936              |
| Human IL10 neutralizing antibody                     | R&D Systems              | MAB217         | 23738             |
| Human IL1 $\beta$ neutralizing antibody              | R&D Systems              | MAB601         | 2805              |
| Human CCL8 neutralizing antibody                     | R&D System               | MAB281         | 35509             |
| Mouse IgG1 Isotype Control                           | R&D System               | MAB002         | 11711             |
| <i>InVivo</i> Mab anti-mouse PD-1 antibody           | Bio X Cell               | BE0146         | RMP1-14           |
| <i>InVivo</i> Mab rat IgG2a isotype control antibody | Bio X Cell               | BE0089         | 2A3               |
| <i>InVivo</i> Mab anti-mouse CSF1R antibody          | Bio X Cell               | BE0213         | AFS98             |
| Mouse anti-human CD68                                | DakoCytomation           | M0876          | PG-M1             |

|                                                 |                           |            |            |
|-------------------------------------------------|---------------------------|------------|------------|
| Rabbit anti-human GLUT1                         | Merck Millipore           | 07-1401    | polyclonal |
| Mouse anti-human CD204                          | TransGenic                | KT022      | SRA-E5     |
| Rabbit anti-human CCL8                          | Abcam                     | ab9671     | polyclonal |
| Rabbit anti-human CA12                          | Cell Signaling Technology | 5864       | D75C6      |
| Rabbit anti-human phospho-p38                   | Cell Signaling Technology | 4511       | D3F9       |
| Rabbit anti-human p38                           | Cell Signaling Technology | 9212       | polyclonal |
| Rabbit anti-human phospho-p65                   | Cell Signaling Technology | 3033       | 93H1       |
| Rabbit anti-human p65                           | Cell Signaling Technology | 8242       | D14E12     |
| Rabbit anti-human phospho-I $\kappa$ B $\alpha$ | Cell Signaling Technology | 2859       | 14D4       |
| Mouse anti-human I $\kappa$ B $\alpha$          | Cell Signaling Technology | 4814       | L35A5      |
| Rabbit anti-human phospho-JNK                   | Cell Signaling Technology | 4668       | 81E11      |
| Rabbit anti-human JNK                           | Cell Signaling Technology | 9252       | polyclonal |
| Rabbit anti-human phospho-Erk1/2                | Cell Signaling Technology | 4370       | D13.14.4E  |
| Rabbit anti-human Erk1/2                        | Cell Signaling Technology | 4695       | 137F5      |
| Rabbit anti-human Vimentin                      | Cell Signaling Technology | 5741       | D21H3      |
| Rabbit anti-human E-cadherin                    | Cell Signaling Technology | 3195       | 24E10      |
| Rabbit anti-human N-cadherin                    | Cell Signaling Technology | 13116      | D4R1H      |
| Rabbit anti-human SNAI1                         | Cell Signaling Technology | 3879       | C15D3      |
| Rabbit anti-human SNAI2                         | Cell Signaling Technology | 9585       | C19G7      |
| Rabbit anti-human TWIST1                        | Cell Signaling Technology | 69366      | E7E2G      |
| Rabbit anti-mouse F4/80                         | Cell Signaling Technology | 70076      | D2S9R      |
| HRP-linked goat anti-rabbit IgG antibodies      | Cell Signaling Technology | 7074       | polyclonal |
| HRP-linked goat anti-mouse IgG antibodies       | Cell Signaling Technology | 7076       | polyclonal |
| Rabbit anti-human TWIST2                        | Signalway Antibody        | 21669      | polyclonal |
| Mouse anti-human $\beta$ -actin                 | Boster                    | BM0627     | AC-15      |
| Mouse anti-human GAPDH                          | Boster                    | BM1623     |            |
| Rabbit anti-human CD14                          | SinoBiological            | 10073-R001 | 001        |

**Supplemental Table 7. Reagents used in studies.**

| <b>Name</b>                        | <b>Supplier</b>          | <b>Cat no.</b> |
|------------------------------------|--------------------------|----------------|
| DNase I                            | Sigma-Aldrich            | DN25           |
| Collagenase IV                     | Sigma-Aldrich            | C5138          |
| Hyaluronidase                      | Sigma-Aldrich            | H1136          |
| Collagenase XI                     | Sigma-Aldrich            | C7657          |
| Hepes                              | Sigma-Aldrich            | H4034          |
| MES                                | Sigma-Aldrich            | M3671          |
| 2-Deoxy-D-glucose (2DG)            | Sigma-Aldrich            | D8375          |
| 3PO                                | Sigma-Aldrich            | SML1343        |
| Acetazolamide                      | Sigma-Aldrich            | A6011          |
| SB202190                           | Sigma-Aldrich            | S7067          |
| GdCl <sub>3</sub>                  | Sigma-Aldrich            | 439770         |
| L-lactic acid                      | Sigma-Aldrich            | L6402          |
| DMOG                               | Sigma-Aldrich            | D3695          |
| ML-265 (TEPP-46)                   | Cayman Chemical          | 13942          |
| DMSO                               | Merck Millipore          | 317275         |
| Echinomycin                        | Merck Millipore          | 330175         |
| Recombinant human TNF $\alpha$     | R&D Systems              | 210-TA-020     |
| Recombinant human IL6              | R&D Systems              | 206-IL-010     |
| Recombinant human IL10             | R&D Systems              | 217-IL-005     |
| Recombinant human IL1 $\beta$      | R&D Systems              | 201-LB-005     |
| Recombinant human CCL8             | R&D System               | 281-CP-010     |
| Cultrex Basement Membrane Extract  | R&D Systems              | 3432-005-01    |
| Penicillin                         | GENVIEW                  | AP231          |
| Streptomycin.                      | GENVIEW                  | AS325          |
| FBS                                | Gibco                    | 10099-141      |
| BSA                                | Biofroxx                 | 4240GR250      |
| Triton X-100                       | Aladdin                  | T109027        |
| DAPI                               | Roche                    | 10236276001    |
| SYTOX Green                        | Thermo Fisher Scientific | S7020          |
| Human CD14 <sup>+</sup> MicroBeads | Miltenyi Biotec          | 130-050-201    |
| ACK lysis buffer                   | TBD Science              | NH4CL2009      |
| Trizol reagent                     | Thermo Fisher Scientific | AM9738         |
| RPMI 1640 medium                   | Thermo Fisher Scientific | C11875500BT    |

|                                          |                          |                |
|------------------------------------------|--------------------------|----------------|
| DMEM                                     | Thermo Fisher Scientific | C11995500BT    |
| HCO <sub>3</sub> <sup>-</sup> -free DMEM | Sigma-Aldrich            | D7777          |
| 5X All-In-One RT MasterMix               | abm                      | G492           |
| SYBR Green Real-Time PCR Mix             | TOYOBO                   | QPS-201        |
| Tyramide signal amplification kit        | Panovue                  | PPK007100100   |
| Lactate assay kit                        | eton bioscience          | 1200011002     |
| P3 primary cell 4D-Nucleofector X kit    | Lonza                    | V4XP-3024      |
| Apoptosis analysis kit                   | eBioscience              | 88-8005-72     |
| Human TNF $\alpha$ ELISA kit             | eBioscience              | 88-7346-86     |
| Human IL6 ELISA kit                      | eBioscience              | 88-7066-88     |
| Human IL10 ELISA kit                     | eBioscience              | 88-7106-88     |
| Human IL1 $\beta$ ELISA kit              | eBioscience              | 88-7261-88     |
| Human CCL8 ELISA kit                     | BioLegend                | 442204         |
| Brefeldin A                              | BioLegend                | 420601         |
| Clodronate liposome and control liposome | FormuMax                 | F700101C-NC-10 |

---
